# Supplementary material for: Oxygen activation on a carbon catalyst support co-doped with Si and transition metals: an electrochemical study
Source: Royal Society of Chemistry journal article supplement (doi:10.1039/d4nj05300a), 2025-01-01
Supplement: d4nj05300a1.pdf [file d4nj05300a1.pdf]

## SUPPORTING INFORMATION

### Additional schemes

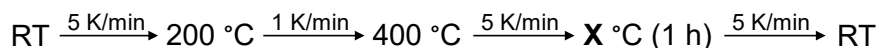

**Scheme S1:** Heating program for the synthesis of NSiC<sub>x</sub> materials at different pyrolysis temperatures X (vide infra).

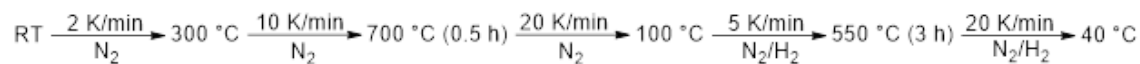

**Scheme S2.** Heating program for the synthesis of metal loaded materials.

### Additional Tables

**Table S1:** Sample, pyrolysis temperature X and ceramic amount of the NSiC<sub>x</sub> materials.

| Entry | Sample               | Pyrolysis temperature X<br>[°C] | Ceramic amount<br>[%] |
|-------|----------------------|---------------------------------|-----------------------|
| 1     | NSiC <sub>600</sub>  | 600                             | 69                    |
| 2     | NSiC <sub>700</sub>  | 700                             | 66                    |
| 3     | NSiC <sub>800</sub>  | 800                             | 62                    |
| 4     | NSiC <sub>900</sub>  | 900                             | 59                    |
| 5     | NSiC <sub>1000</sub> | 1000                            | 55                    |

**Table S2.** Entry, sample, metal salt, amount of metal salt and support material of the single metal loaded materials.

| Entry | Sample                                  | Metal<br>salt                                          | Amount of<br>metal salt<br>[mg] | Support material     |
|-------|-----------------------------------------|--------------------------------------------------------|---------------------------------|----------------------|
| 1     | Ag <sub>100</sub> /NSiC <sub>1000</sub> | AgNO <sub>3</sub>                                      | 32.8                            | NSiC <sub>1000</sub> |
| 2     | Co <sub>100</sub> /NSiC <sub>1000</sub> | Co(NO <sub>3</sub> ) <sub>2</sub> • 6 H <sub>2</sub> O | 102.9                           | NSiC <sub>1000</sub> |
| 3     | Mn <sub>100</sub> /NSiC <sub>1000</sub> | Mn(NO <sub>3</sub> ) <sub>2</sub> • 4 H <sub>2</sub> O | 95.2                            | NSiC <sub>1000</sub> |
| 4     | Mn <sub>100</sub> /NSiC <sub>600</sub>  | Mn(NO <sub>3</sub> ) <sub>2</sub> • 4 H <sub>2</sub> O | 95.2                            | NSiC <sub>600</sub>  |
| 5     | Mn <sub>100</sub> /NSiC <sub>700</sub>  | Mn(NO <sub>3</sub> ) <sub>2</sub> • 4 H <sub>2</sub> O | 95.2                            | NSiC <sub>700</sub>  |
| 6     | Mn <sub>100</sub> /NSiC <sub>800</sub>  | Mn(NO <sub>3</sub> ) <sub>2</sub> • 4 H <sub>2</sub> O | 95.2                            | NSiC <sub>800</sub>  |
| 7     | Mn <sub>100</sub> /NSiC <sub>900</sub>  | Mn(NO <sub>3</sub> ) <sub>2</sub> • 4 H <sub>2</sub> O | 95.2                            | NSiC <sub>900</sub>  |

**Table S3.** Sample, Amount of metal salt ( $\text{Mn}(\text{NO}_3)_2 \cdot 4 \text{H}_2\text{O}$ ,  $\text{AgNO}_3$  and  $\text{Co}(\text{NO}_3)_2 \cdot 6 \text{H}_2\text{O}$ ) used in the synthesis of bimetal loaded materials.

| Entry | Sample                                            | Amount of metal salt [mg]                             |                 |                                                       |
|-------|---------------------------------------------------|-------------------------------------------------------|-----------------|-------------------------------------------------------|
|       |                                                   | $\text{Mn}(\text{NO}_3)_2 \cdot 4 \text{H}_2\text{O}$ | $\text{AgNO}_3$ | $\text{Co}(\text{NO}_3)_2 \cdot 6 \text{H}_2\text{O}$ |
| 1     | $\text{Mn}_{50}\text{Ag}_{50}/\text{NSiC}_{1000}$ | 47.6                                                  | 16.4            | 0                                                     |
| 2     | $\text{Mn}_{50}\text{Co}_{50}/\text{NSiC}_{1000}$ | 47.6                                                  | 0               | 51.5                                                  |
| 3     | $\text{Mn}_{75}\text{Ag}_{25}/\text{NSiC}_{1000}$ | 71.4                                                  | 8.2             | 0                                                     |
| 4     | $\text{Mn}_{25}\text{Ag}_{75}/\text{NSiC}_{1000}$ | 23.8                                                  | 24.6            | 0                                                     |

**Table S4.** Elemental analysis for Mn-Co and Mn-Ag mixed metal catalysts.

| Entry | Sample                                          | Amount of metal present [wt%] |          |          |
|-------|-------------------------------------------------|-------------------------------|----------|----------|
|       |                                                 | Mn [wt%]                      | Co [wt%] | Ag [wt%] |
| 1     | $\text{Mn}_{100}/\text{NSiC}-1000$              | 4.02                          | 0        | 0        |
| 2     | $\text{Mn}_{50}\text{Co}_{50}/\text{NSiC}-1000$ | 2.12                          | 2.05     | 0        |
| 3     | $\text{Mn}_{50}\text{Ag}_{50}/\text{NSiC}-1000$ | 2.07                          | 0        | 1.99     |

**Table S5.** Elemental analysis for Ag-Mn mixed metal catalysts.

| Entry | Sample                                     | Amount of metal present [wt%] |          |
|-------|--------------------------------------------|-------------------------------|----------|
|       |                                            | Mn [wt%]                      | Ag [wt%] |
| 1     | $\text{Ag}_{100}/\text{NSiC}$              | 0.00                          | 3.99     |
| 2     | $\text{Mn}_{75}\text{Ag}_{25}/\text{NSiC}$ | 2.94                          | 1.09     |
| 3     | $\text{Mn}_{50}\text{Ag}_{50}/\text{NSiC}$ | 2.07                          | 1.99     |
| 4     | $\text{Mn}_{25}\text{Ag}_{75}/\text{NSiC}$ | 1.04                          | 3.07     |
| 5     | $\text{Mn}_{100}/\text{NSiC}$              | 4.02                          | 0.00     |

### Additional Equations

$$\%H_2O_2 = \frac{2 \cdot \frac{i_{ring}}{N}}{i_{disk} + \frac{i_{ring}}{N}} \times 100 \quad (S1)$$

## Additional figures

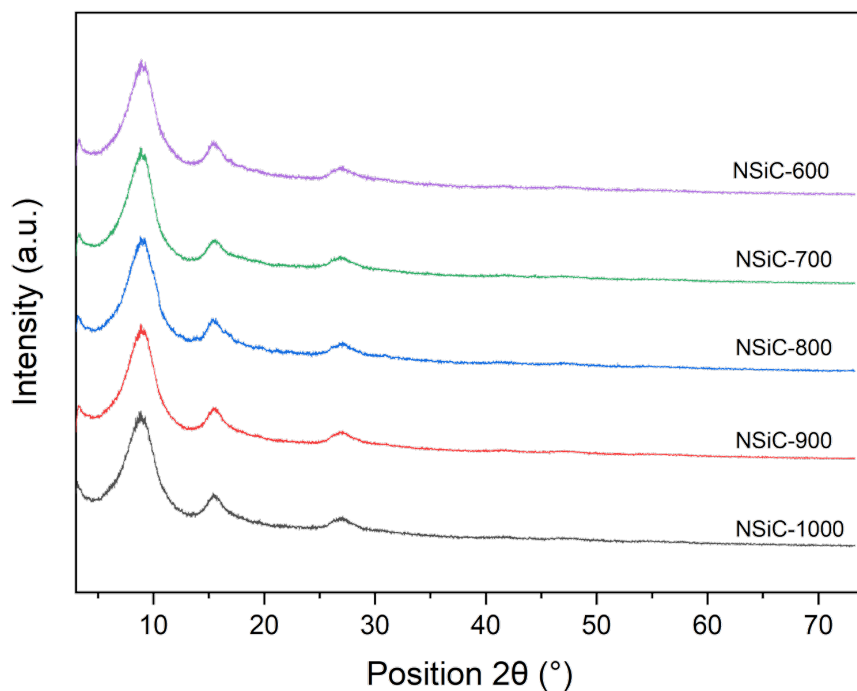

**Figure S1.** X-ray diffractogram of pristine NSiC-*T*, where *T* = 600, 700, 800, 900, and 1000 °C.

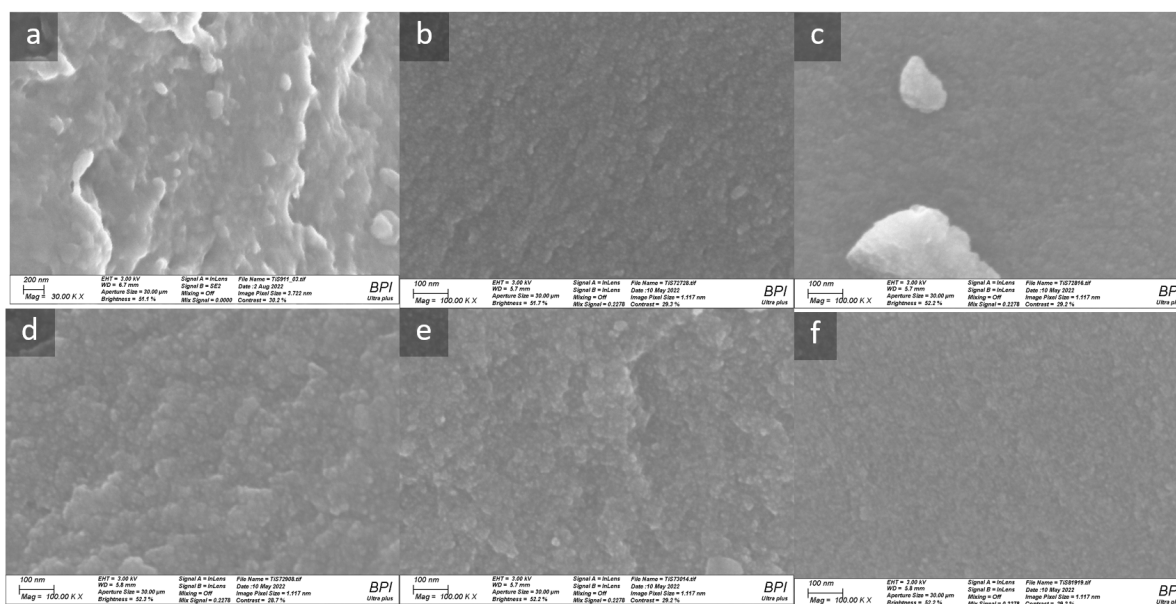

**Figure S2.** HRSEM images of NSiC-*T* precursor (a) and NSiC-*T* materials (b-f) at increasing pyrolysis temperatures (*T*): (b) 600 °C, (c) 700 °C, (d) 800 °C, (e) 900 °C, (f) 1000 °C.

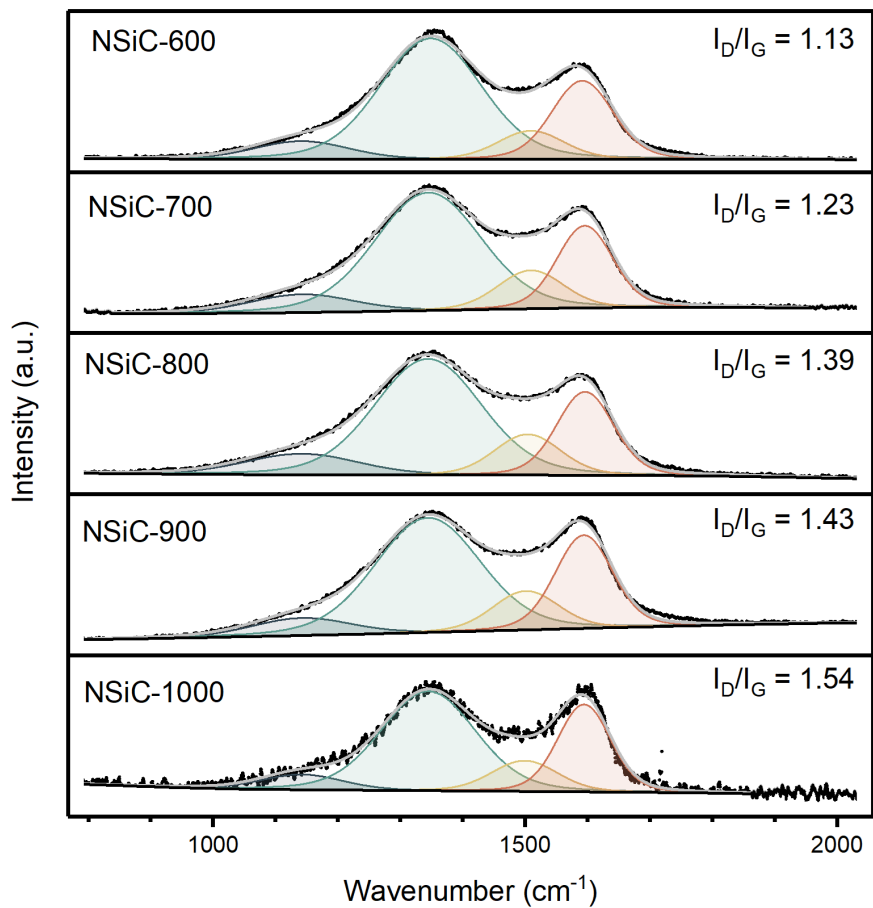

**Figure S3.** Raman data of NSiC-*T* materials at different pyrolysis temperatures.

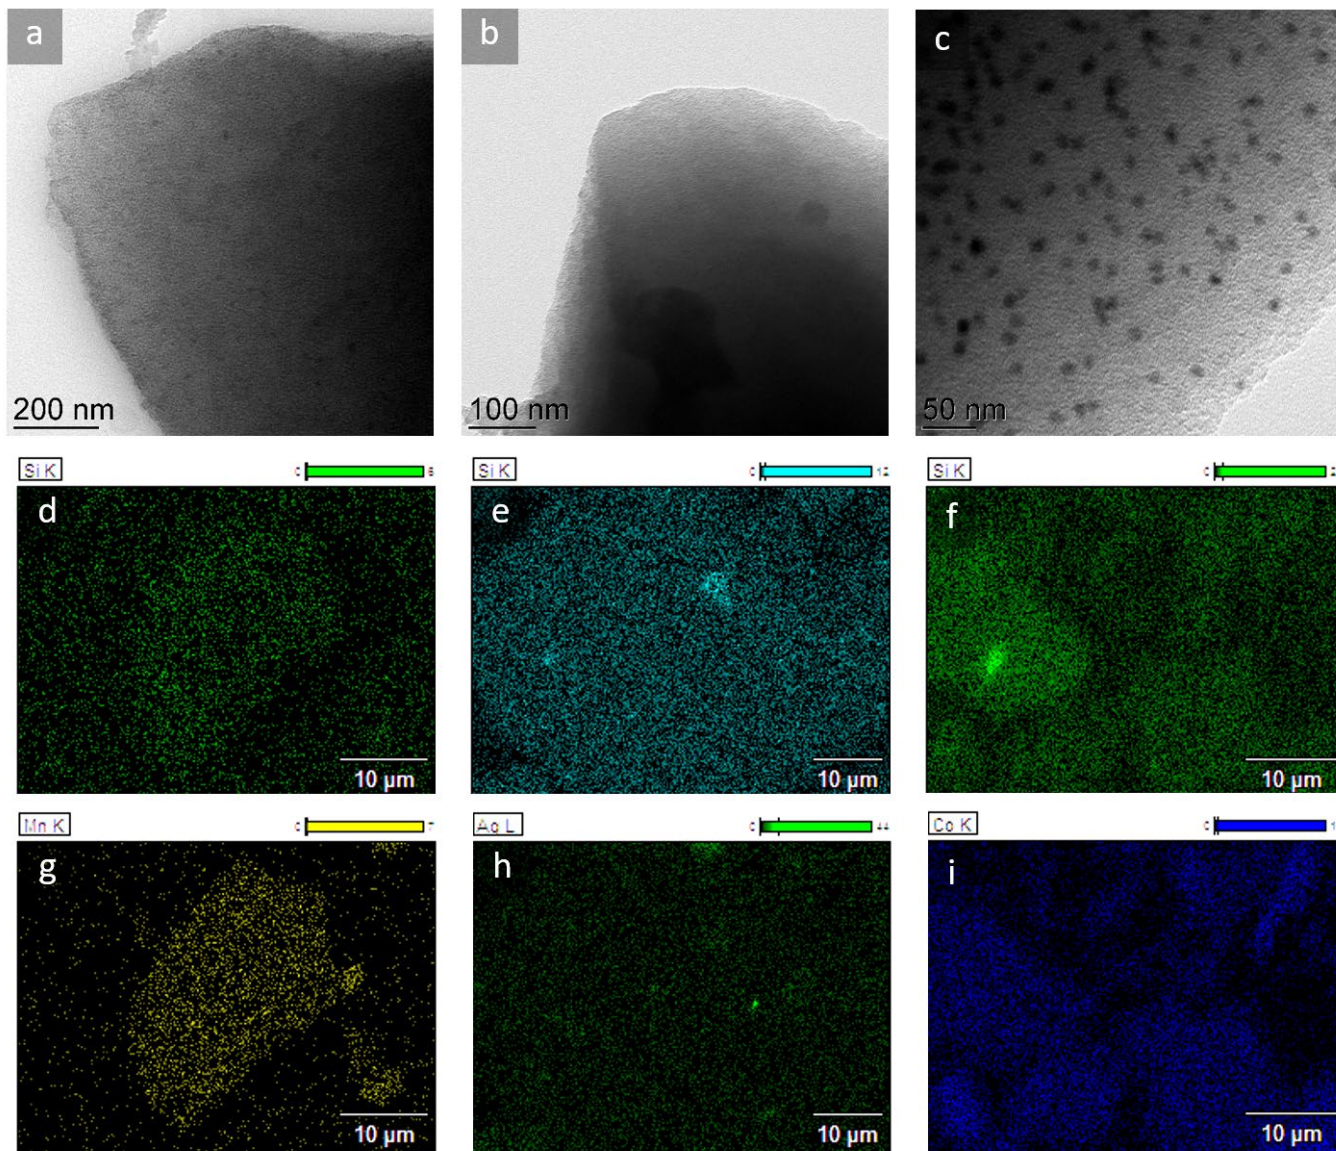

**Figure S4.** (a-c) TEM images of Mn, Ag and Co impregnated NSiC-T materials. (d-f) STEM-EDS elemental mapping of silicon and (g-i) the impregnated metals (Mn, Ag and Co, respectively)

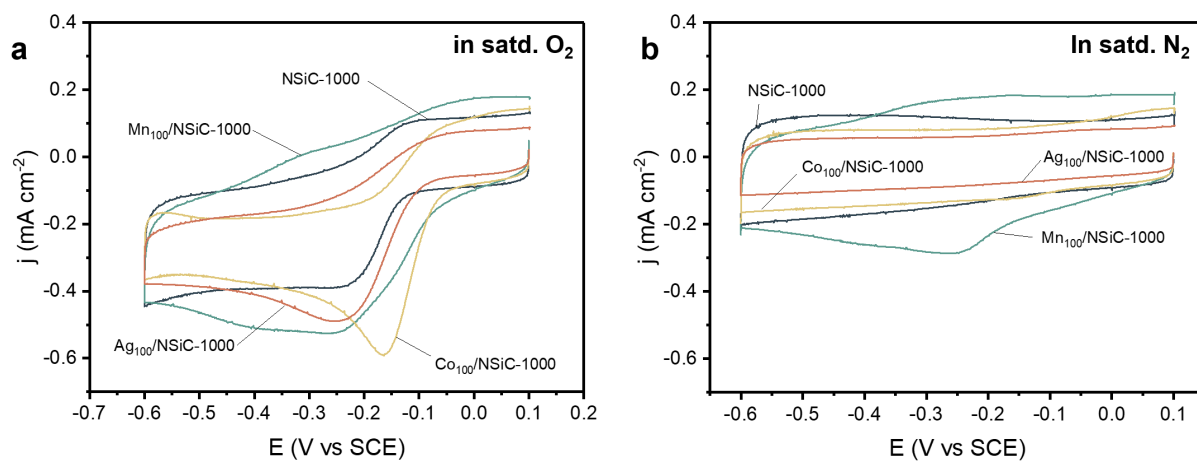

**Figure S5.** Cyclic voltammogram for Mn, Co and Ag impregnated NSiC-1000 materials (a) in O<sub>2</sub> saturated electrolyte and (b) in N<sub>2</sub> electrolyte.

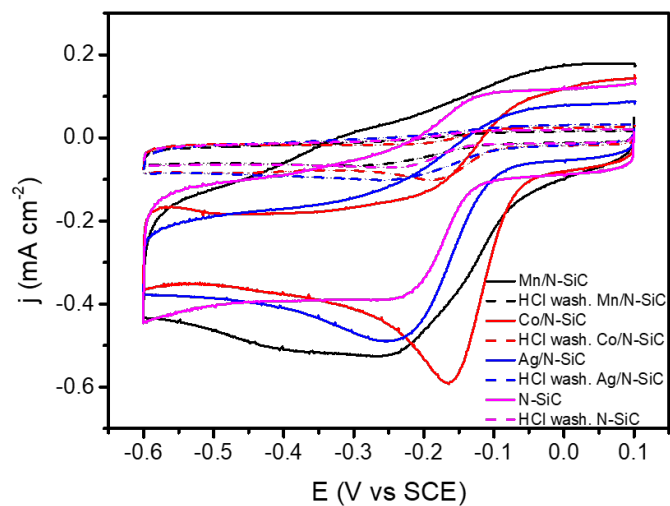

**Figure S6.** Cyclic voltammogram before and after washing of the Mn, Co and Ag impregnated NSiC-1000 materials.

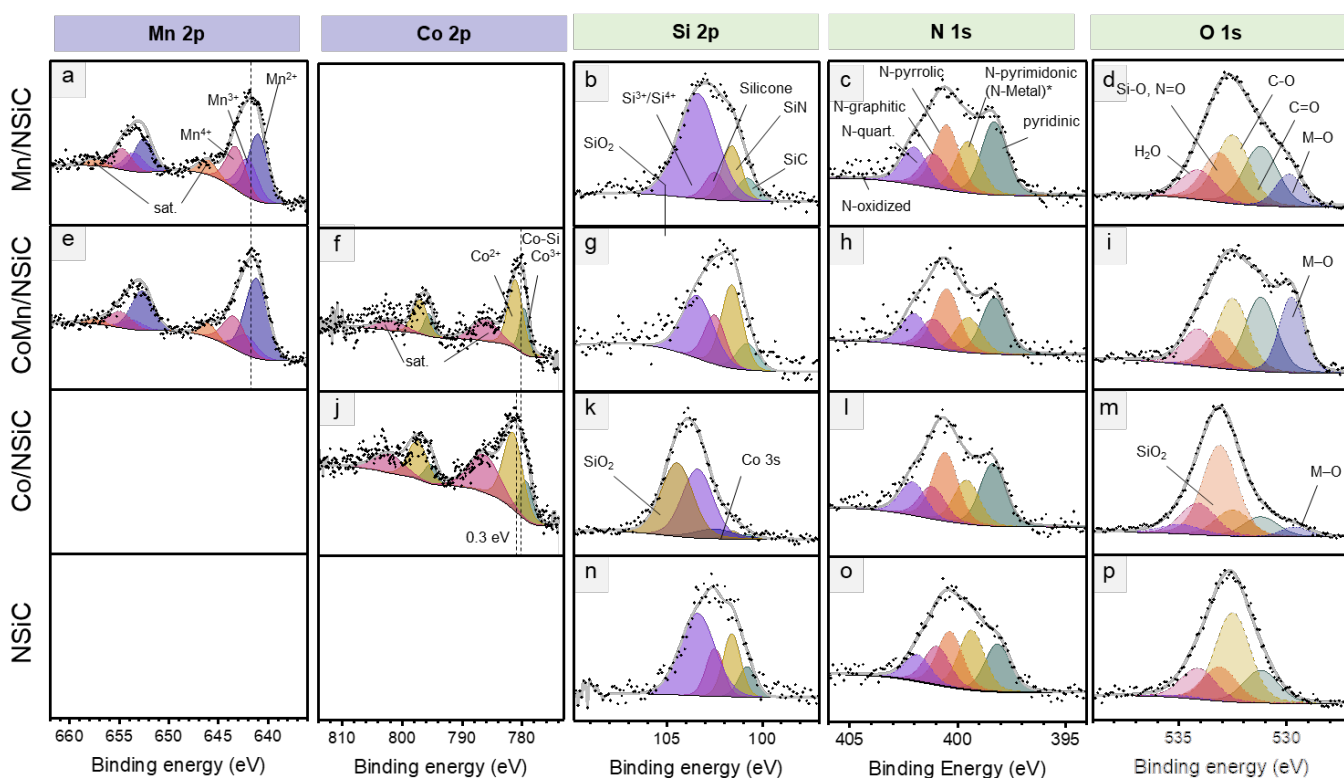

**Figure S7.** XPS data for Co, Co-Mn, Mn on NSiC, and on pristine NSiC materials.

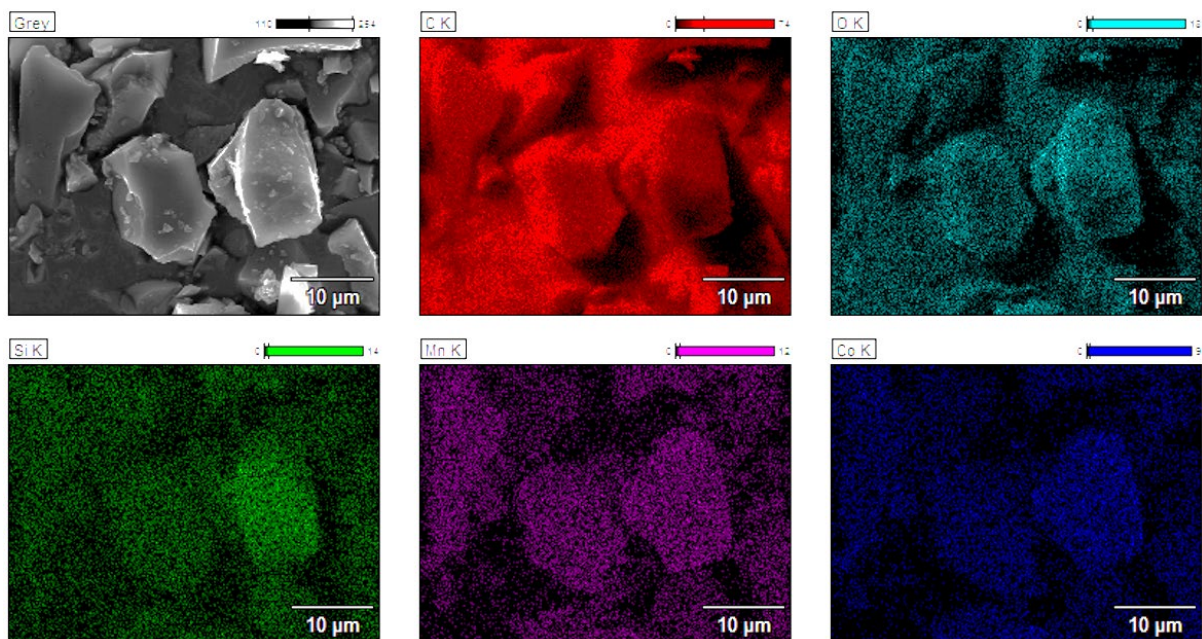

**Figure S8.** HAADF-STEM image of Mn-Co/NSiC-1000 with (a) a secondary electron image, and (b-f) elemental mapping images of C, O, Si, Mn and Co.

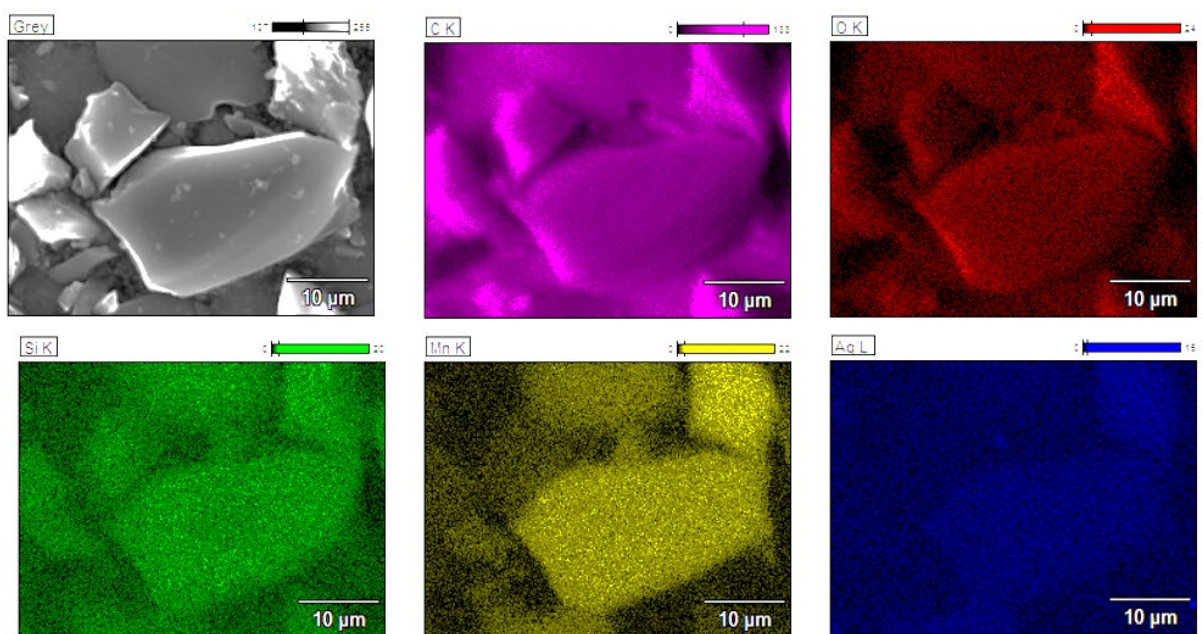

**Figure S9.** HAADF-STEM image of Mn-Ag/NSiC-1000 with (a) a secondary electron image, and (b-f) elemental mapping images of C, O, Si, Mn and Ag.

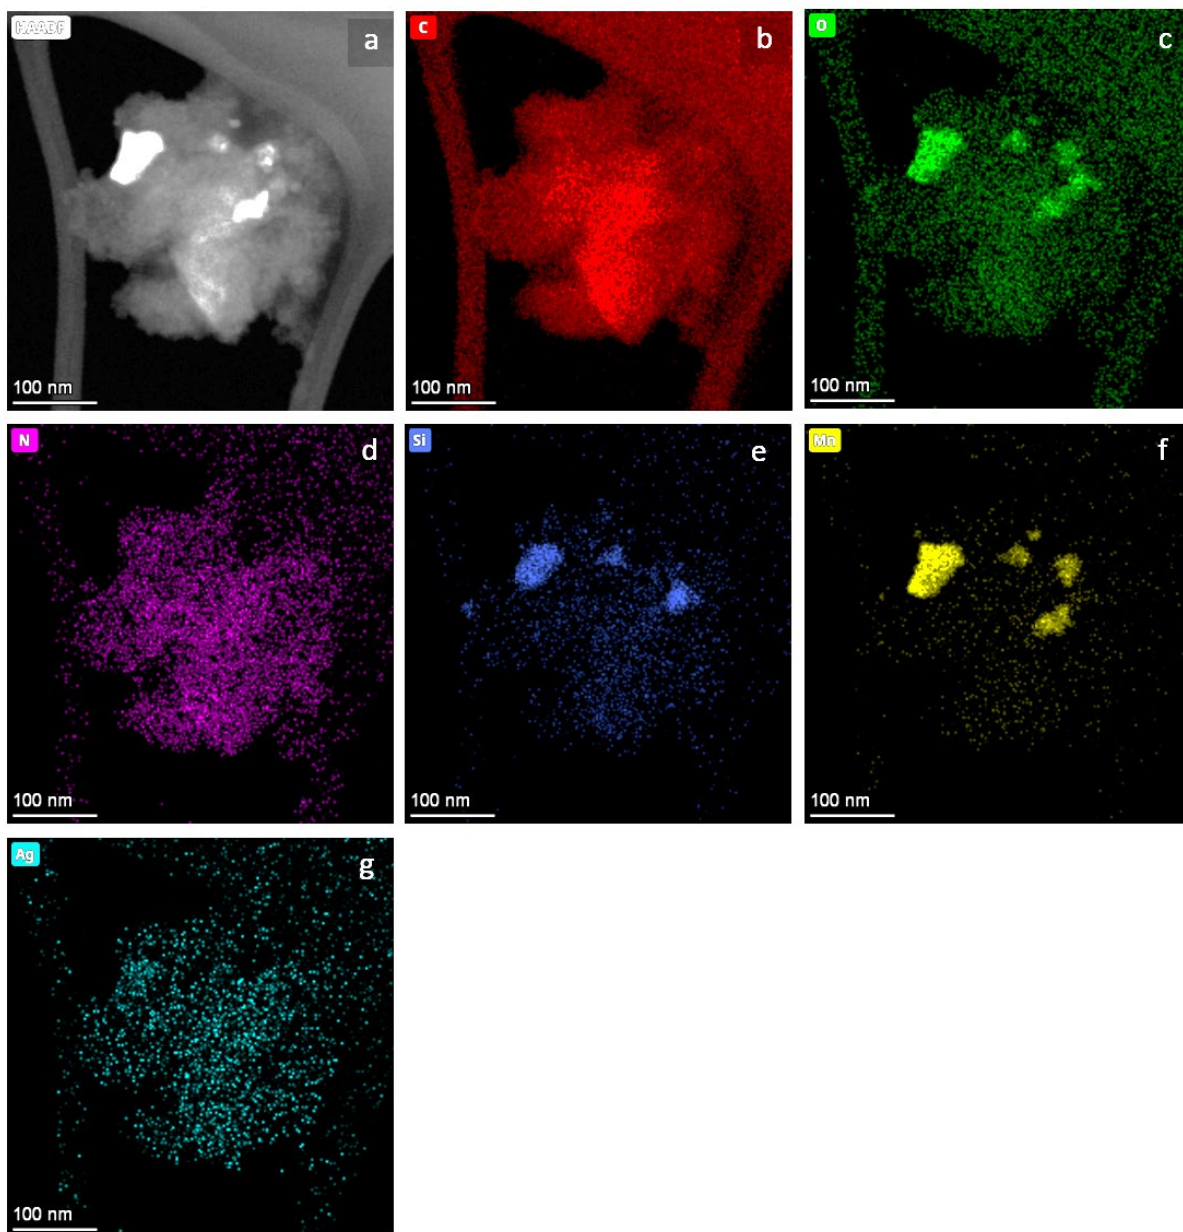

**Figure S10.** HAADF-STEM image of Mn<sub>25</sub>Ag<sub>75</sub>/NSiC-1000 with (a) a secondary electron image, and (b-g) elemental mapping images of C, O, N, Si, Mn and Ag, respectively.

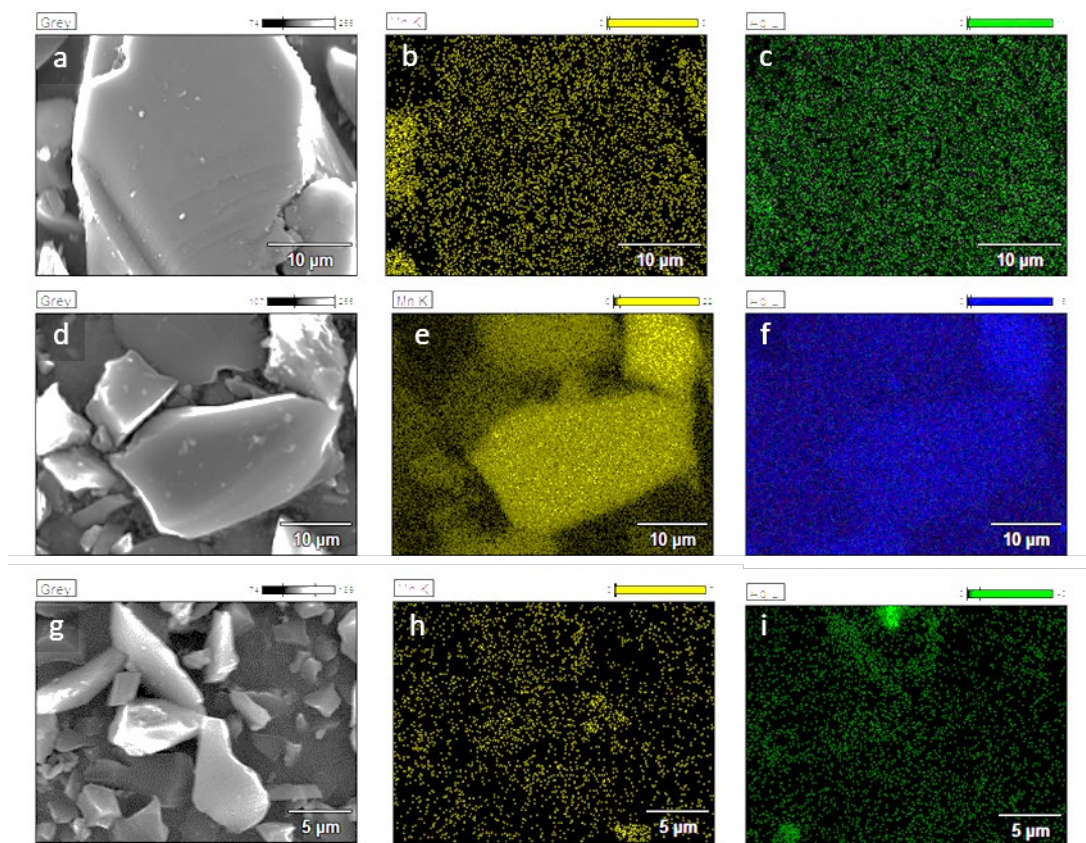

**Figure S11.** HAADF-STEM image of MnAg-impregnated NSiC-1000. Mn:Ag ratio was 3:1 (a), 1:1 (d) and 3:1 (g), respectively, followed by elemental mapping for Mn K-line and Ag L-line from the X-ray EDS signal (b/c, e/f, h/i for Mn:Ag ratios 3:1, 1:1 and 3:1, respectively). Micrographs a,d,g are based on the secondary electron detector.
